# Supplementary material for: Chemical Basis of Metabolic Network Organization
Source: PLoS Comput Biol. 2011 Oct 13;7(10):e1002214. doi: 10.1371/journal.pcbi.1002214 (PMC3192814; doi:10.1371/journal.pcbi.1002214)
Supplement: Table S4 — Basic information for 80 E. coli metabolites that have absolute concentration values and are involved in the metabolic network. (XLS) [file pcbi.1002214.s005.xls]

## Sheet: Sheet1
Table S4 Basic information for 80 E. coli metabolites that have absolute concentration values and are involved in the metabolic network.
Metabolite	Concentration (mol/L)	Degree	Reactant count	5mem arom rings Moleculesa	5mem nonarom rings Moleculesa	5mem rings Moleculesa	6mem arom rings Moleculesa	6mem nonarom rings Moleculesa	6mem rings Moleculesa	Acceptorb	Alcohol Moleculesa	AlogP98 Moleculesa	ALogPc	Amide Moleculesa	AREAb	Aromatic Bonds Moleculesa	AtomCountb	BondCountb	C Countc	Carbox acid Moleculesa	Chiralb	ClogPd	Donorb	Double Bonds Moleculesa	DPSA1b	DPSA2b	DPSA3b	Ether Moleculesa	FNSA1b	FNSA2b	FNSA3b	FPSA1b	FPSA2b	FPSA3b	Fused arom rings Moleculesa	Fused rings Moleculesa	HBA Countc	HBD Countc	Heavy Atoms Moleculesa	Hetero atoms Moleculesa	Hydrogens Moleculesa	Hydrophobeb	Lipinski violations Moleculesa	LogDc	LScore Moleculesa	Molecular FractionalPolarSASAc	Molecular SASAc	Molecular SAVolc	Molecular Solubilityc
4-hydroxybenzoate	5.2e-05	3	4	0	0	0	1	0	1	3	1	1.167	1.217	0	305.444	6	16	16	7	1	0	1.5572	1	1	84.656	411.479	60.879	0	0.383	-0.436	-0.093	0.617	0.703	0.076	0	0	1	1	10	3	6	1	0	-0.236	0.38129	114.494	292.296	260.653	-1.09134
5-phosphoribosyl 1-pyrophosphate	0.00026	15	9	0	1	1	0	0	0	14	2	-2.1541	-2.433	0	507.682	0	35	35	5	0	4	-4.0665	10	3	6.606	2175.89	138.561	1	0.493	-2.12	-0.174	0.507	2.176	0.099	0	0	4	2	22	17	13	1	2	-6.931	0.00113953	369.186	464.139	410.618	2.47611
Acetoacetyl-CoA	2.2e-05	3	2	1	1	2	1	0	1	21	2	-2.8736	-3.085	2	1177.48	10	94	96	25	0	5	-4.1253	12	7	512.241	9845.43	216.721	1	0.294	-2.327	-0.102	0.706	5.581	0.072	1	1	12	5	54	29	40	4	3	-7.542	1.73296e-07	615.237	1035.1	914.638	-0.488943
acetyl-CoA	0.00061	27	22	1	1	2	1	0	1	20	2	-2.6446	-2.996	2	1109.29	10	89	91	23	0	5	-3.5391	12	6	435.979	8798.46	211.939	1	0.314	-2.36	-0.108	0.686	5.167	0.074	1	1	11	5	51	28	38	4	3	-7.4	3.82029e-07	588.398	984.944	870.127	-0.228393
acetylphosphate	0.0011	3	3	0	0	0	0	0	0	5	0	-0.5097	-0.646	0	264.19	0	13	12	2	0	0	-1.298	3	2	-32.238	391.338	69.299	0	0.56	-0.819	-0.192	0.44	0.643	0.067	0	0	2	0	8	6	5	0	0	-2.075	0.290042	147.158	262.965	233.203	0.49804
adenine	1.5e-06	13	4	1	0	1	1	0	1	4	0	-0.5813	-0.442	0	292.53	10	15	16	5	0	0	-0.148	3	0	175.529	507.318	68.002	0	0.26	-0.361	-0.072	0.74	1.028	0.114	1	1	3	2	10	5	5	2	0	-0.442	0.361175	133.181	287.918	255.935	-0.298522
adenosine	1.3e-07	4	4	1	1	2	1	0	1	7	3	-2.0201	-1.881	0	453.228	10	32	34	10	0	4	-2.1577	4	0	264.82	1441.97	91.994	1	0.239	-0.679	-0.079	0.761	2.163	0.103	1	1	4	4	19	9	13	3	0	-1.881	0.0462012	238.621	422.337	372.709	-0.38532
adenosine phosphosulfate	6.6e-06	2	1	1	1	2	1	0	1	13	2	-2.3487	-2.378	0	596.38	10	41	43	10	0	4	-3.8855	5	3	120.808	2536.76	119.393	1	0.407	-1.593	-0.095	0.593	2.324	0.09	1	1	6	3	27	17	14	3	1	-5.986	0.000943578	379.118	548.584	488.451	-0.313441
ADP	0.00056	7	6	1	1	2	1	0	1	13	2	-2.2357	-2.239	0	592.563	10	42	44	10	0	4	-3.8855	8	2	170.993	2858.86	142.286	1	0.367	-1.634	-0.121	0.633	2.82	0.101	1	1	6	3	27	17	15	3	2	-5.563	0.000847171	374.953	541.193	480.583	0.991113
ADP-glucose	4.3e-06	2	1	1	1	2	1	1	2	18	6	-4.1401	-4.355	0	774.593	10	63	66	16	0	9	-4.1221	11	2	372.808	5274.57	160.911	2	0.278	-1.747	-0.092	0.722	4.54	0.1	1	1	8	7	38	22	25	4	3	-5.848	3.74946e-05	493.519	705.442	621.59	1.36031
alanine	0.0026	26	9	0	0	0	0	0	0	2	0	-0.7073	-3.161	0	245.408	0	13	12	3	1	1	-3.124	1	1	108.828	250.577	40.297	0	0.283	-0.283	-0.095	0.717	0.718	0.066	0	0	1	1	6	3	7	0	0	-3.161	0.5829	131.524	238.669	208.063	-0.11033
AMP	0.00028	25	22	1	1	2	1	0	1	10	2	-1.9559	-1.952	0	527.446	10	37	39	10	0	4	-3.2249	6	1	188.711	2120.27	126.437	1	0.337	-1.235	-0.116	0.663	2.434	0.103	1	1	5	3	23	13	14	3	1	-3.438	0.00617223	306.787	481.765	426.646	0.234905
Anthranilate	3.5e-06	5	4	0	0	0	1	0	1	3	0	0.6878	0.713	0	302.022	6	17	17	7	1	0	1.208	1	1	130.351	447.063	54.48	0	0.322	-0.393	-0.076	0.678	0.828	0.073	0	0	1	1	10	3	7	1	0	-0.761	0.378455	131.524	297.42	263.669	-1.26283
arginine	0.00057	4	3	0	0	0	0	0	0	2	0	-1.2136	-3.831	0	391.187	0	26	25	6	1	1	-3.517	4	2	219.762	865.943	75.957	0	0.25	-0.493	-0.086	0.75	1.479	0.087	0	0	1	3	12	6	14	0	0	-3.879	0.143857	248.043	362.918	314.465	-0.017083
asparagine	0.00051	6	2	0	0	0	0	0	0	3	0	-1.954	-4.408	1	291.877	0	17	16	4	1	1	-3.5442	2	2	58.191	518.79	70.541	0	0.407	-0.677	-0.145	0.593	0.988	0.081	0	0	2	2	9	5	8	0	0	-4.407	0.313857	210.894	284.088	248.81	-0.341213
aspartate	0.0042	26	14	0	0	0	0	0	0	4	0	-1.3518	-3.78	0	287.647	0	16	15	4	2	1	-2.4116	1	2	20.611	485.557	68.797	0	0.465	-0.759	-0.158	0.535	0.872	0.073	0	0	2	1	9	5	7	0	0	-5.248	0.311618	193.864	278.963	245.793	-0.367189
ATP	0.0096	59	58	1	1	2	1	0	1	16	2	-2.5155	-2.526	0	659.354	10	47	49	10	0	4	-4.5462	10	3	144.16	3712.27	161.565	1	0.398	-2.085	-0.129	0.602	3.15	0.099	1	1	7	3	31	21	16	3	3	-7.034	0.000115743	443.118	600.621	534.52	1.79264
cis-aconitate	1.6e-05	2	1	0	0	0	0	0	0	6	0	-0.5191	-0.337	0	324.957	0	18	17	6	3	0	-0.8476	0	4	-7.985	688.057	88.567	0	0.511	-1.001	-0.175	0.489	0.957	0.077	0	0	3	0	12	6	6	1	0	-3.285	0.160679	203.674	319.688	285.986	-1.29044
citrate	0.002	4	3	0	0	0	0	0	0	7	1	-1.395	-1.319	0	335.783	0	21	20	6	3	0	-1.9978	1	3	-41.669	808.041	87.298	0	0.559	-1.291	-0.187	0.441	1.016	0.062	0	0	3	0	13	7	8	0	0	-3.85	0.109264	239.175	326.973	290.46	-0.388749
citrulline	0.0014	5	2	0	0	0	0	0	0	3	0	-1.4313	-3.885	2	385.289	0	25	24	6	1	1	-3.357	3	2	165.278	852.762	85.02	0	0.308	-0.61	-0.11	0.692	1.368	0.087	0	0	2	3	12	6	13	0	0	-3.885	0.164471	225.982	355.833	308.789	-0.771963
CMP	0.00036	13	7	0	1	1	0	1	1	9	2	-2.4697	-2.468	2	501.268	0	35	36	9	0	4	-3.2623	6	4	216.081	1919.83	117.565	1	0.304	-1.059	-0.112	0.696	2.424	0.101	0	0	4	3	21	12	14	2	1	-3.953	0.0111021	281.039	453.691	400.669	0.192688
coenzyme A	0.0014	40	28	1	1	2	1	0	1	19	2	-2.6106	-2.962	2	1043.53	10	84	86	21	0	5	-3.8733	13	5	446.934	8038.87	195.843	1	0.298	-2.166	-0.1	0.702	5.109	0.077	1	1	10	5	48	27	36	4	3	-7.433	6.73191e-07	600.96	934.23	828.574	1.16126
CTP	0.0027	12	9	0	1	1	0	1	1	15	2	-3.0293	-3.041	2	632.445	0	45	46	9	0	4	-4.5837	10	6	169.996	3413.79	150.578	1	0.374	-1.89	-0.126	0.626	3.159	0.097	0	0	6	3	29	20	16	2	2	-7.55	0.000209207	417.371	572.547	508.543	1.56202
cyclic-AMP	3.5e-05	2	0	1	1	2	1	1	2	9	1	-1.3469	-1.555	0	485.398	10	34	37	10	0	4	-2.3727	4	1	190.895	1644.28	100.089	1	0.311	-1.013	-0.103	0.689	2.245	0.095	1	2	6	2	22	12	12	4	1	-2.708	0.012417	241.814	454.509	403.333	0.305492
cytidine	2.6e-06	5	4	0	1	1	0	1	1	6	3	-2.5339	-2.396	2	427.552	0	30	31	9	0	4	-2.1951	4	3	290.686	1276.56	82.152	1	0.198	-0.525	-0.07	0.802	2.131	0.101	0	0	3	4	17	8	13	2	0	-2.396	0.0805124	212.873	394.263	346.732	-0.274689
cytosine	1.4e-05	4	0	0	0	0	0	1	1	2	0	-1.0951	-0.958	2	271.189	0	13	13	4	0	0	-1.846	2	3	136.705	399.539	68.189	0	0.295	-0.354	-0.1	0.705	0.846	0.105	0	0	2	2	8	4	5	1	0	-0.958	0.515388	120.3	272.167	241.773	-0.412545
dATP	1.6e-05	4	2	1	1	2	1	0	1	15	1	-1.9424	-1.76	0	647.175	10	46	48	10	0	3	-4.0158	9	3	169.704	3393.53	150.235	1	0.378	-1.839	-0.121	0.622	3.02	0.094	1	1	7	2	30	20	16	3	2	-6.268	0.000186327	407.617	595.394	529.251	1.68539
dCTP	3.5e-05	5	3	0	1	1	0	1	1	14	1	-2.4562	-2.275	2	618.939	0	44	45	9	0	3	-4.2867	9	6	136.035	3082.78	144.732	1	0.397	-1.855	-0.132	0.603	2.818	0.087	0	0	6	2	28	19	16	2	2	-6.783	0.000336769	381.869	567.32	503.275	1.70696
deoxyadenosine	2.8e-06	1	1	1	1	2	1	0	1	6	2	-1.1319	-0.993	0	441.53	10	31	33	10	0	4	-1.6064	3	0	266.632	1214.37	79.959	1	0.227	-0.564	-0.073	0.773	1.924	0.09	1	1	4	3	18	8	13	3	0	-0.993	0.068576	203.119	407.417	358.977	-0.916248
deoxyguanosine	5.2e-07	3	1	1	1	2	0	1	1	7	2	-1.8376	-1.613	1	453.766	5	32	34	10	0	3	-2.612	6	2	212.016	1443.2	103.549	1	0.295	-0.823	-0.103	0.705	1.967	0.097	0	1	4	4	19	9	13	3	0	-1.613	0.0486476	225.785	434.094	382.443	-0.568981
deoxyribose-5-phosphate	0.0003	3	2	0	1	1	0	0	0	7	2	-1.3654	-1.308	0	372.647	0	24	24	5	0	3	-2.7135	5	1	101.162	863.768	85.182	1	0.364	-0.844	-0.139	0.636	1.474	0.09	0	0	2	1	13	8	11	1	0	-2.794	0.0949629	197.353	340.056	297.475	1.265
dGMP	5.1e-05	3	2	1	1	2	0	1	1	10	1	-1.7734	-1.685	1	528.256	5	37	39	10	0	3	-3.6791	8	3	131.263	2148.36	140.591	1	0.389	-1.409	-0.139	0.611	2.208	0.097	0	1	5	3	23	13	14	3	1	-3.198	0.00651354	293.951	493.522	436.38	0.0319178
dihydroorotate	1.2e-05	3	2	0	0	0	0	1	1	4	0	-1.3205	-1.296	3	313.918	0	17	17	5	1	1	-0.751	2	3	18.009	614.705	85.422	0	0.473	-0.882	-0.173	0.527	0.984	0.086	0	0	3	2	11	6	6	1	0	-2.729	0.26899	162.845	299.637	266.468	-0.443465
dihydroxyacetone phosphate	0.00037	13	6	0	0	0	0	0	0	6	1	-1.5238	-1.52	0	322.52	0	17	16	3	0	0	-1.9699	4	2	25.622	664.685	88.283	0	0.462	-0.907	-0.17	0.538	1.056	0.09	0	0	2	1	10	7	7	0	0	-3.039	0.188608	182.66	302.665	267.446	1.15194
dTDP	0.00038	6	3	0	1	1	0	1	1	11	1	-1.6465	-1.596	3	573.974	0	41	42	10	0	3	-3.1126	7	5	175.468	2400.02	128.499	1	0.357	-1.398	-0.127	0.643	2.521	0.083	0	0	5	2	25	15	16	2	1	-4.92	0.0022315	293.908	515.544	455.512	0.959996
dTTP	0.0046	5	4	0	1	1	0	1	1	14	1	-1.9263	-1.883	3	639.069	0	46	47	10	0	3	-3.7733	9	6	148.252	3186.62	146.471	1	0.391	-1.836	-0.133	0.609	2.865	0.083	0	0	6	2	29	19	17	2	2	-6.392	0.000305241	362.074	574.972	509.449	1.69649
FAD	0.00017	5	3	1	1	2	2	2	4	20	5	-1.4014	-2.097	3	1065.69	16	86	91	27	0	7	-3.3851	12	6	440.775	8558.24	212.616	1	0.308	-2.298	-0.098	0.692	5.17	0.087	1	3	11	7	53	26	33	6	3	-5.061	9.16242e-07	534.258	950.897	841.55	-1.88636
fructose-1,6-bisphosphate	0.015	5	4	0	1	1	0	0	0	12	3	-2.4352	-2.707	0	489.901	0	34	34	6	0	4	-4.1863	9	2	65.716	1913.96	133.948	1	0.433	-1.69	-0.167	0.567	2.213	0.106	0	0	3	2	20	14	14	1	2	-5.734	0.004358	336.522	432.472	380.365	2.41689
fumarate	0.00012	6	3	0	0	0	0	0	0	4	0	-0.2252	0.038	0	270.912	0	12	11	4	2	0	-0.166	0	3	-10.389	399.016	77.582	0	0.517	-0.668	-0.172	0.483	0.624	0.079	0	0	2	0	8	4	4	0	0	-2.71	0.427093	141.333	262.151	235.221	-0.793424
GDP	0.00068	13	8	1	1	2	0	1	1	14	2	-2.6263	-2.738	1	605.523	5	43	45	10	0	4	-4.8702	11	4	100.553	3161.52	164.456	1	0.424	-2.026	-0.145	0.576	2.752	0.103	0	1	6	4	28	18	15	3	2	-6.36	0.000555663	397.618	558.177	495.586	0.789302
gluconate	4.2e-05	5	1	0	0	0	0	0	0	7	5	-2.838	-2.813	0	360.708	0	25	24	6	1	4	-3.1057	5	1	118.273	1002.06	87.039	0	0.348	-0.896	-0.125	0.652	1.679	0.098	0	0	1	5	13	7	12	0	1	-4.274	0.118708	256.5	338.485	296.119	-0.131664
glucosamine-6-phosphate	0.0012	5	1	0	0	0	0	1	1	8	3	-2.7388	-2.875	0	416.074	0	30	30	6	0	5	-3.2511	7	1	131.597	1274.81	98.519	1	0.344	-1.04	-0.132	0.656	1.982	0.102	0	0	2	3	16	10	14	1	1	-5.058	0.031276	285.386	380.414	331.542	1.1677
glutamate	0.096	91	32	0	0	0	0	0	0	4	0	-1.0306	-3.459	0	318.3	0	19	18	5	2	1	-2.6938	1	2	38.432	547.6	74.002	0	0.443	-0.723	-0.15	0.557	0.911	0.07	0	0	2	1	10	5	9	0	0	-4.92	0.265143	193.864	303.743	266.305	-0.463339
glutamine	0.0038	39	17	0	0	0	0	0	0	3	0	-1.6328	-4.087	1	323.383	0	20	19	5	1	1	-3.3746	2	2	91.114	575.371	71.765	0	0.368	-0.614	-0.131	0.632	1.056	0.078	0	0	2	2	10	5	10	0	0	-4.086	0.267178	210.894	308.867	269.322	-0.486081
glutathione	0.017	9	4	0	0	0	0	0	0	6	0	-2.3437	-4.772	2	534.936	0	37	36	10	2	2	-3.051	4	4	153.848	1783.97	107.944	0	0.365	-1.142	-0.12	0.635	1.984	0.069	0	0	4	3	20	10	17	0	0	-6.152	0.0102953	345.675	493.613	441.405	-0.827135
glutathione disulfide	0.0024	1	1	0	0	0	0	0	0	12	0	-4.5282	-9.385	4	979.93	0	72	71	20	4	4	-5.8288	6	8	270.075	6111.53	194.812	0	0.366	-2.224	-0.125	0.634	3.857	0.069	0	0	8	6	40	20	32	1	3	-12.145	1.49825e-05	595.897	849.881	755.871	-3.613
glycerate	0.0014	6	1	0	0	0	0	0	0	4	2	-1.3059	-1.281	0	255.804	0	13	12	3	1	1	-1.9421	2	1	55.441	382.858	63.769	0	0.397	-0.563	-0.14	0.603	0.853	0.096	0	0	1	2	7	4	6	0	0	-2.753	0.490666	149.995	248.464	218.777	0.275987
glycerol-3-phosphate	4.9e-05	11	5	0	0	0	0	0	0	6	2	-1.3439	-1.48	0	327.718	0	19	18	3	0	1	-2.5896	5	1	82.886	678.712	81.373	0	0.378	-0.755	-0.141	0.622	1.243	0.099	0	0	1	2	10	7	9	0	0	-2.999	0.171242	191.322	307.298	269.227	1.41931
GTP	0.0049	17	15	1	1	2	0	1	1	17	2	-2.9061	-3.025	1	672.23	5	48	50	10	0	4	-5.5309	13	5	73.777	4045.04	183.378	1	0.449	-2.498	-0.151	0.551	3.062	0.101	0	1	7	4	32	22	16	3	3	-8.121	7.58975e-05	465.784	617.605	549.523	1.55813
guanine	0.00019	6	4	1	0	1	0	1	1	5	0	-0.9719	-0.941	1	312.164	5	16	17	5	0	0	-1.1575	5	2	121.533	669.337	89.944	0	0.345	-0.59	-0.112	0.655	1.122	0.118	0	1	3	3	11	6	5	2	0	-0.941	0.270458	155.846	304.902	270.939	-0.193518
guanosine	1.6e-06	4	2	1	1	2	0	1	1	8	3	-2.4107	-2.38	1	466.162	5	33	35	10	0	4	-3.1424	7	2	192.937	1666.63	113.935	1	0.317	-1.003	-0.111	0.683	2.164	0.105	0	1	4	5	20	10	13	3	0	-2.38	0.0307844	261.287	439.321	387.712	-0.485098
homocysteine	0.00037	9	6	0	0	0	0	0	0	2	0	-0.303	-3.016	0	302.417	0	17	16	4	1	1	-2.0722	2	1	103.588	370.928	51.904	0	0.337	-0.393	-0.098	0.663	0.771	0.065	0	0	1	1	8	4	9	0	0	-2.902	0.261567	199.481	293.553	264.693	0.307891
lysine	0.00041	4	1	0	0	0	0	0	0	2	0	-0.7865	-3.24	0	356.429	0	24	23	6	1	1	-3.424	2	1	216.284	531.509	52.207	0	0.212	-0.3	-0.071	0.788	1.114	0.068	0	0	1	2	10	4	14	1	0	-4.214	0.30242	184.055	333.053	286.346	-0.890163
malate	0.0017	8	3	0	0	0	0	0	0	5	1	-1.0622	-1.012	0	286.935	0	15	14	4	2	1	-1.5203	1	2	-37.6	528.88	82.086	0	0.56	-0.946	-0.192	0.44	0.743	0.07	0	0	2	1	9	5	6	0	0	-3.877	0.321711	176.834	273.838	242.776	-0.358494
malonyl-CoA	3.5e-05	2	2	1	1	2	1	0	1	22	2	-2.8595	-3.185	2	1161.22	10	92	94	24	1	5	-4.1707	12	7	421.632	10027.7	230.601	1	0.328	-2.683	-0.112	0.672	5.495	0.076	1	1	12	5	54	30	38	4	3	-7.589	1.14413e-07	650.739	1025.24	907.858	-0.0993666
methionine	0.00015	15	6	0	0	0	0	0	0	2	0	-0.1211	-2.834	0	341.934	0	20	19	5	1	1	-1.7306	1	1	181.444	415.593	46.234	0	0.246	-0.286	-0.072	0.754	0.878	0.058	0	0	1	1	9	4	11	1	0	-2.833	0.272953	160.08	318.893	282.247	-1.14452
N-acetyl-glucosamine-1-phosphate	8.2e-05	4	2	0	0	0	0	1	1	9	3	-2.7174	-2.854	1	438.097	0	35	35	8	0	5	-2.2363	7	2	78.303	1491.42	101.816	1	0.412	-1.384	-0.155	0.588	1.978	0.074	0	0	3	4	19	11	16	1	1	-3.896	0.0179799	274.781	432.709	378.26	0.618171
N-acetyl-ornithine	4.3e-05	4	3	0	0	0	0	0	0	3	0	-1.2213	-3.675	1	382.07	0	26	25	7	1	1	-3.6974	2	2	182.648	690.141	64.817	0	0.275	-0.468	-0.1	0.725	1.236	0.06	0	0	2	2	12	5	14	0	0	-3.674	0.240208	173.45	360.568	312.553	-1.04648
NAD+	0.0026	7	5	1	2	3	2	0	2	17	4	-2.8346	-3.05	1	915.789	16	72	76	21	0	8	-7.8005	10	3	463.605	6984.17	187.175	2	0.266	-1.68	-0.083	0.734	5.361	0.105	1	1	9	6	44	23	28	5	3	-5.963	1.03819e-05	516.112	813.22	718.519	-0.333391
NADH	8.3e-05	2	1	1	2	3	1	1	2	17	4	-3.8437	-4.059	1	915.107	10	73	77	21	0	8	-4.6891	11	5	429.458	6313.59	182.953	2	0.275	-1.819	-0.095	0.725	4.789	0.097	1	1	9	6	44	23	29	5	3	-6.954	1.27391e-05	497.011	807.079	712.44	0.339688
ornithine	1e-05	3	3	0	0	0	0	0	0	2	0	-1.2427	-3.697	0	327.45	0	21	20	5	1	1	-3.953	2	1	198.662	466.523	49.846	0	0.21	-0.286	-0.071	0.79	1.075	0.074	0	0	1	2	9	4	12	0	0	-4.535	0.35794	184.055	308.273	265.835	-0.468121
phenylalanine	1.8e-05	2	2	0	0	0	1	0	1	2	0	0.8486	-1.605	0	357.733	6	23	23	9	1	1	-1.556	1	1	160.706	536.307	51.479	0	0.3	-0.4	-0.068	0.7	0.933	0.06	0	0	1	1	12	3	11	1	0	-1.605	0.296947	131.524	342.572	300.829	-2.05073
phenylpyruvate	9e-05	3	1	0	0	0	1	0	1	3	0	1.2054	1.37	0	350.94	6	20	20	9	1	0	0.524	0	2	90.013	539.815	60.333	0	0.391	-0.51	-0.092	0.609	0.794	0.054	0	0	2	0	12	3	8	1	0	-0.101	0.322443	105.831	332.814	296.031	-2.24984
Phosphoenolpyruvate	0.00018	10	9	0	0	0	0	0	0	6	0	-0.3752	-0.486	0	300.811	0	15	14	3	1	0	-1.0055	3	3	-13.078	578.086	85.701	0	0.521	-0.956	-0.178	0.479	0.88	0.094	0	0	2	0	10	7	5	0	0	-3.566	0.161842	182.66	287.701	256.674	-0.103355
proline	0.00039	3	1	0	1	1	0	0	0	2	0	-0.1633	-2.843	0	288.203	0	17	17	5	1	1	-2.413	1	1	156.235	296.285	40.791	0	0.233	-0.236	-0.079	0.767	0.775	0.061	0	0	1	1	8	3	9	0	0	-2.843	0.547884	94.0794	276.263	240.538	-0.334045
propionyl-CoA	5.3e-06	11	9	1	1	2	1	0	1	20	2	-1.9777	-2.329	2	1148.09	10	92	94	24	0	5	-3.0101	12	6	551.017	9177.17	202.472	1	0.273	-2.065	-0.094	0.727	5.51	0.073	1	1	11	5	52	28	40	4	3	-6.733	2.85873e-07	588.398	1009.72	890.639	-0.467669
quinolinate	1.2e-05	4	2	0	0	0	1	0	1	5	0	0.8718	0.367	0	317.026	6	17	17	7	2	0	-0.0417	1	2	17.712	577.932	73.16	0	0.476	-0.757	-0.135	0.524	0.835	0.066	0	0	3	0	12	5	5	1	0	-2.524	0.205224	155.558	313.999	282.201	-1.32632
riboflavin	1.9e-05	3	0	0	0	0	1	2	3	8	4	0.2253	-0.255	3	600.843	6	47	49	17	0	3	-0.7255	6	4	256.633	2325.2	117.962	0	0.311	-1.065	-0.102	0.689	2.361	0.072	0	2	4	5	27	10	20	3	0	-0.271	0.00640571	240.929	561.317	494.547	-2.81278
S-adenosyl-L-methionine	0.00018	16	14	1	1	2	1	0	1	8	2	-3.4472	-3.329	0	640.167	10	49	51	15	0	5	-5.0763	4	1	321.962	2623.44	134.25	1	0.269	-1.013	-0.107	0.731	2.75	0.085	1	1	4	4	27	12	22	3	1	-4.334	0.00832816	317.992	577.821	506.515	-1.96628
serine	6.8e-05	16	13	0	0	0	0	0	0	3	1	-1.5955	-4.049	0	259.859	0	14	13	3	1	1	-2.811	2	1	95.151	362.114	54.717	0	0.321	-0.437	-0.113	0.679	0.922	0.093	0	0	1	2	7	4	7	0	0	-4.048	0.479015	167.025	253.589	221.794	0.260851
shikimate	1.4e-05	2	2	0	0	0	0	1	1	5	3	-1.1785	-1.154	0	340.246	0	22	22	7	1	3	-1.1624	3	2	123.634	658.014	74.767	0	0.326	-0.603	-0.116	0.674	1.246	0.094	0	0	1	3	12	5	10	1	0	-2.624	0.219962	185.497	315.014	277.111	-0.345606
succinate	0.00057	17	12	0	0	0	0	0	0	4	0	-0.41	-0.36	0	276.192	0	14	13	4	2	0	-0.5256	0	2	-7.643	394.873	71.458	0	0.513	-0.68	-0.177	0.487	0.646	0.063	0	0	2	0	8	4	6	0	0	-3.031	0.429434	141.333	268.611	237.508	-0.19574
succinyl-CoA	0.00023	9	8	1	1	2	1	0	1	22	2	-2.8247	-3.15	2	1191.87	10	95	97	25	1	5	-3.9409	12	7	428.349	10174.9	230.052	1	0.328	-2.683	-0.112	0.672	5.506	0.073	1	1	12	5	55	30	40	4	3	-9.022	9.60874e-08	650.739	1050.02	928.369	-0.241392
threonine	0.00018	6	3	0	0	0	0	0	0	3	1	-1.218	-3.672	0	280.488	0	17	16	4	1	2	-2.502	2	1	136.98	392.809	48.455	0	0.257	-0.358	-0.091	0.743	1.033	0.081	0	0	1	2	8	4	9	0	0	-3.67	0.420406	167.025	268.676	233.843	-0.279589
tryptophan	1.2e-05	6	2	1	0	1	1	0	1	2	0	1.1421	-1.312	0	403.822	10	27	28	11	1	1	-1.566	2	1	186.794	757.24	64.348	0	0.303	-0.484	-0.068	0.697	1.115	0.068	1	1	1	2	15	4	12	2	0	-1.311	0.15615	152.844	379.089	333.579	-2.64014
tyrosine	2.9e-05	2	2	0	0	0	1	0	1	3	1	0.5812	-1.847	0	372.61	6	24	24	9	1	1	-2.223	2	1	147.862	651.484	64.54	0	0.322	-0.506	-0.083	0.678	1.067	0.073	0	0	1	2	13	4	11	1	0	-1.795	0.198789	167.025	352.207	309.962	-1.65506
UDP-D-glucuronate	0.00057	3	2	0	1	1	0	2	2	18	5	-4.5749	-4.798	3	752.21	0	59	61	15	1	9	-4.6619	10	6	227.429	5086.48	176.365	2	0.359	-2.268	-0.125	0.641	4.055	0.094	0	0	8	6	37	22	22	3	3	-8.59	4.80641e-05	474.815	668.37	592.241	0.31077
uridine	0.0021	10	8	0	1	1	0	1	1	6	3	-2.5571	-2.451	3	417.309	0	29	30	9	0	4	-2.2187	4	3	237.338	1221.49	85.612	1	0.244	-0.643	-0.091	0.756	1.993	0.094	0	0	3	4	17	8	12	2	0	-2.449	0.0941011	193.078	384.671	339.873	-0.151367
UTP	0.0083	9	7	0	1	1	0	1	1	15	2	-3.0525	-3.096	3	622.227	0	44	45	9	0	4	-4.6072	10	6	116.799	3315.76	154.17	1	0.411	-2.069	-0.143	0.589	2.96	0.091	0	0	6	3	29	20	15	2	2	-8.192	0.000248175	397.575	562.956	501.684	1.67464
valine	0.00398107	4	3	0	0	0	0	0	0	2	0	0.1357	-2.318	0	290.77	0	19	18	5	1	1	-2.286	1	1	161.115	322.355	39.065	0	0.225	-0.248	-0.078	0.775	0.853	0.056	0	0	1	1	8	3	11	1	0	-2.318	0.461175	131.524	278.536	240.624	-0.721864
a calculated with Tripos Benchware DataMiner (Version 1.6. Tripos Associates Inc. St. Louis, MO.)
b calculated with Sybyl (Version 7.0. Tripos Associates Inc. St. Louis, MO.)
c calculated with Pipeline Pilot (Student Edition. Version 6.1.5. SciTegic Accelrys Inc. San Diego, CA.)
d calculated with Cerius2 (Version 4.11L. Accelrys Inc. San Diego, CA.)
Descriptor	Characterization
5mem arom rings Molecules	Number of 5 membered aromatic rings
5mem nonarom rings Molecules	Number of 5 membered nonaromatic rings
5mem rings Molecules	Number of 5 membered rings
6mem arom rings Molecules	Number of 6 membered aromatic rings
6mem nonarom rings Molecules	Number of 6 membered nonaromatic rings
6mem rings Molecules	Number of 6 membered rings
Acceptor	Number of hydrogen acceptors
Alcohol Molecules	Number of alcohol
ALogP	The Ghose and Crippen octanol-water partition coefficient
AlogP98 Molecules	Water/octanol partition coeff
Amide Molecules	Number of amide
AREA	Molecular total surface area
Aromatic Bonds Molecules	Number of aromatic bonds
AtomCount	Number of atoms in the molecule
BondCount	Number of bonds in the molecule
C Count	Number of Carbon atoms
Carbox acid Molecules	Number of carbox acid
Chiral	Number of chiral center
CLOGP	Partition coefficient octanol/water
Donor	Number of hydrogen donors
Double Bonds Molecules	Number of double Bonds
DPSA1	Partial positive surface area minus partial negative surface area
DPSA2	Total charge weighted partial positive surface area minus total charge weighted partial negative surface area
DPSA3	Atomic charge weighted partial positive surface area minus atomic charge weighted partial negative surface area
Ether Molecules	Number of ether
FNSA1	Ratio of partial negative surface area on total molecular surface area
FNSA2	Ratio of total charge weighted partial negative surface area on total molecular surface area
FNSA3	Ratio of atomic charge weighted partial negative surface area on total molecular surface area
FPSA1	Ratio of partial positive surface area on total molecular surface area
FPSA2	Ratio of total charge weighted partial positive surface area on total molecular surface area
FPSA3	Ratio of atomic charge weighted partial positive surface area on total molecular surface area
Fused arom rings Molecules	Number of fused aromatic rings
Fused rings Molecules	Number of fused rings
HBA Count	Number of hydrogen bond acceptors
HBD Count	Number of hydrogen bond donating groups in the molecule
Heavy Atoms	Number of heavy atoms
Hetero atoms Molecules	Number of Hetero atoms
Hydrogens Molecules	Number of hydrogen atom
Hydrophobe	Number of Hydrophobe
Lipinski violations Molecules	Number of failing Lipinski criteria
LogD	Octanol-water partition coefficient calculated taking into account the ionization states of the molecule
LScore Molecules	Floating point Lipinski measure
Molecular FractionalPolarSASA	Polar solvent accessible surface area for each molecule using a 2D approximation
Molecular SASA	Total solvent accessible surface area for each molecule using a 2D approximation
Molecular SAVol	Solvent accessible volume for each molecule using a 2D approximation
Molecular Solubility	Water solubility, expressed as logS, where S is the solubility in mol/L
Molecular SurfaceArea	Total surface area for each molecule using a 2D approximation
Molecular Volume	3D volume for each molecule using the current 3D coordinates
MR Molecules	Ghose and Crippen estimate of molar refractivity
MW	Molecular weight
N Count	Number of Nitrogen atoms
Num AromaticRings	Number of base rings that are aromatic
Num H Donors	Number of hydrogen donors
O Count	Number of Oxygen atoms
P Count	Number of Phosphorus atoms
pLC50 Molecules	Negative log of Lethal concentration 50%
PNSA1	Partial negative surface area
PNSA2	Total charge weighted partial negative surface area
PNSA3	Atomic charge weighted partial negative surface area
Polarizability Molecules	Estimates the molecular polarizability of each structure
PPSA1	Partial positive surface area
PPSA2	Total charge weighted partial positive surface area
PPSA3	Atomic charge weighted partial positive surface area
PSA	Molecular polar surface area (includes all O, N, S atoms and covalently bonded H's)
PV	Molecular polar volume (includes O, N, S atoms and covalently bonded H's)
RingCount	Number of hydrogen donors
RNCG	Ratio of most negative charge on sum total negative charge（Relative negative charge）
RNCS	Relative negative charge surface area
Rotatable Molecules	Number of rotatable bonds
RotBonds	Number of rotatable bonds in the molecule
RPCG	Ratio of most positive charge on sum total positive charge（Relative positive charge）
RPCS	Relative positive charge surface area
S Count	Number of Sulfur atoms
Single Bonds Molecules	Number of single Bonds
TPSA Molecules	Topological Polar Surface Area
VOL	Molecular surface volume
Volume Molecules	Estimates the molecular volume of each structure
WNSA1	Fraction of the product between partial negative surface area and total molecular surface area on 1000
WNSA2	Fraction of the product between Total charge weighted partial negative surface area and total molecular surface area on 1000
WNSA3	Fraction of the product between atomic charge weighted partial negative surface area and total molecular surface area on 1000
WPSA1	Fraction of the product between partial positive surface area and total molecular surface area on 1000
WPSA2	Fraction of the product between total charge weighted partial positive surface area and total molecular surface area on 1000
WPSA3	Fraction of the product between atomic charge weighted partial positive surface area and total molecular surface area on 1000
[truncated: 37 more columns]
